# Supplementary material for: Ultrasound irradiation mediated preparation of antimony sulfoiodide (SbSI) nanorods as a high-capacity electrode for electrochemical supercapacitors
Source: Royal Society of Chemistry journal article supplement (doi:10.1039/d0qm00863j), 2021-01-01
Supplement: d0qm00863j1.pdf [file d0qm00863j1.pdf]

*Electronic Supplementary Information for*

**Ultrasound irradiation mediated preparation of antimony sulfiodide (SbSI) nanorods  
as a high-capacity electrode for electrochemical supercapacitors**

Sindhuja Manoharan<sup>1</sup>, Dhanasekar Kesavan<sup>1</sup>, Parthiban Pazhamalai<sup>1</sup>,  
Karthikeyan Krishnamoorthy<sup>1</sup>, and Sang-Jae Kim<sup>1,2 \*</sup>

<sup>1</sup>Nanomaterials & System Lab, Major of Mechatronics Engineering,  
Faculty of Applied Energy System, Jeju National University, Jeju 63243, Republic of Korea.

<sup>2</sup>Department of Advanced Convergence Science and Technology,  
Jeju National University, Jeju 63243, Republic of Korea.

\*Corresponding Email id.: [kimsangj@jejunu.ac.kr](mailto:kimsangj@jejunu.ac.kr)

**Table S1. Comparison of the specific capacity of SbSI with the reported supercapacitor electrodes.**

| <b>S. No.</b> | <b>Supercapacitor electrode material</b> | <b>Specific capacity (mAh g<sup>-1</sup>)</b> | <b>Reference</b> |
|---------------|------------------------------------------|-----------------------------------------------|------------------|
| <b>1</b>      | CMS                                      | 32.83                                         | 1                |
| <b>2</b>      | Cu-HCF                                   | 37.06                                         | 2                |
| <b>3</b>      | MnHCF                                    | 81.59                                         | 3                |
| <b>4</b>      | Ni-HCF                                   | 98.88                                         | 4                |
| <b>5</b>      | NiS-PbS                                  | 125.89                                        | 5                |
| <b>6</b>      | Co-Ni-S                                  | 149.44                                        | 6                |
| <b>7</b>      | Mn <sub>3</sub> O <sub>4</sub>           | 366.7                                         | 7                |
| <b>8</b>      | <b>SbSI</b>                              | <b>437.40</b>                                 | <b>This work</b> |

## References

- 1 S. Sahoo, K. Krishnamoorthy, P. Pazhamalai and S. J. Kim, Copper molybdenum sulfide anchored nickel foam: a high performance, binder-free, negative electrode for supercapacitors, *Nanoscale*, 2018, **10**, 13883–13888.
- 2 P. Pazhamalai, K. Krishnamoorthy, S. Sahoo and S. J. Kim, High-energy aqueous Li-ion hybrid capacitor based on metal-organic-framework-mimicking insertion-type copper hexacyanoferrate and capacitive-type graphitic carbon electrodes, *J. Alloys Compd.*, 2018, **765**, 1041–1048.
- 3 P. Pazhamalai, K. Krishnamoorthy, V. K. Mariappan and S. J. Kim, Fabrication of high energy Li-ion hybrid capacitor using manganese hexacyanoferrate nanocubes and graphene electrodes, *J. Ind. Eng. Chem.*, 2018, **64**, 134–142.
- 4 K. Krishnamoorthy, P. Pazhamalai, S. Sahoo, J. H. Lim, K. H. Choi and S. J. Kim, A High-Energy Aqueous Sodium-Ion Capacitor with Nickel Hexacyanoferrate and Graphene Electrodes, *ChemElectroChem*, 2017, **4**, 3302–3308.
- 5 C. H. Mun, C. V. V. Muralee Gopi, R. Vinodh, S. Sambasivam, I. M. Obaidat and H. J. Kim, Microflower-like nickel sulfide-lead sulfide hierarchical composites as binder-free electrodes for high-performance supercapacitors, *J. Energy Storage*, 2019, **26**, 100925.
- 6 C. V. V. M. Gopi, R. Vinodh, S. Sambasivam, I. M. Obaidat, S. Singh and H. J. Kim,  $\text{Co}_9\text{S}_8\text{-Ni}_3\text{S}_2/\text{CuMn}_2\text{O}_4\text{-NiMn}_2\text{O}_4$  and  $\text{MnFe}_2\text{O}_4\text{-ZnFe}_2\text{O}_4/\text{graphene}$  as binder-free cathode and anode materials for high energy density supercapacitors, *Chem. Eng. J.*, 2020, **381**, 122640.
- 7 J. X. Feng, S. H. Ye, X. F. Lu, Y. X. Tong and G. R. Li, Asymmetric paper supercapacitor based on amorphous porous  $\text{Mn}_3\text{O}_4$  negative electrode and  $\text{Ni}(\text{OH})_2$

positive electrode: A novel and high-performance flexible electrochemical energy storage device, *ACS Appl. Mater. Interfaces*, 2015, **7**, 11444–11451.
